# Supplementary material for: TLR7 promotes skin inflammation via activating NFκB-mTORC1 axis in rosacea
Source: PeerJ. 2023 Sep 26;11:e15976. doi: 10.7717/peerj.15976 (PMC10540772; doi:10.7717/peerj.15976)
Supplement: Supplemental Information 3 [file peerj-11-15976-s003.xlsx]

## Sheet: Sheet1
Figure 1H
Tlr7
PBS	LL37
1.40604	5.24751
1.22403	4.38214
1.44557	8.29151
1.0081	7.62974
0.432759	6.02781
0.483516	6.06974
Figure 2G
Tnf-α
	Scr siRNA							siRNA#1							siRNA#2
Control	0.822198	1.23093	1.00355	0.943326	1	1		1.71311	1.78221	1.14287	1.19487	1.47316	1.84877		1.91773	1.82007	3.68986	3.34737	1.9	3.5
LL37	6.28234	6.71122	3.35263	3.74766	6.82627	6.53661		3.9952	2.99946	3.57806	3.71896	1.39301	1.19267		1.59069	1.73043	2.54212	2.42899	1.598	1.42837
Il6
	Scr siRNA							siRNA#1							siRNA#2
Control	1.85165	1.33796	0.409008	0.401383	1.6	0.4		2.29772	3.3828	2.8	0.464396	0.548108	0.5		0.828529	1.78038	0.691457	0.776373	1.3	0.7
LL37	41.0935	32.3515	51.076	48.8686	38.9715	36.1929		22.04	20.1609	28.0465	27.5185	8.30466	7.10019		29.9828	30.1073	14.004	12.7486	23.779	20.3948
Il-1β	Scr siRNA							siRNA#1							siRNA#2
Control	0.7	1.3	1.45646	1.23543	0.676198	0.63191		5.12009	6.79348	1.41539	1.70691	6	1.6		0.24255	0.318795	0.3	0.4	0.5	0.35
LL37	23.8185	26.7619	13.227	12.1459	27.1099	32.3096		6.53043	5.76461	10.9913	9.49777	4.52843	3.82796		9.23776	9.08685	2.5053	2.0173	8.27131	6.49741
Figure 3D
NFKB1			NFKB2			RELA			RELB
Control	R848		Control	R848		Control	R848		Control	R848
0.88587	2.17926		1.26407	3.04391		1.24052	1.6863		1.09978	1.35305
1.00939	2.20315		0.926848	4.5014		0.739503	1.86839		1.00822	1.67465
1.10474	3.98259		0.809078	2.91673		1.01998	1.83851		0.891999	1.60783
Figure 4A
IL-1β
	Control				R848
Vector	1.20048	0.810865	0.988654		1.49655	1.86405	2.04704
TLR7 OE	2.66676	3.17096	2.81579		7.14688	9.68937	9.80514
IL-6
	Control				R848
Vector	0.628757	1.42469	0.946551		1.99206	0.764539	1.05026
TLR7 OE	3.63692	4.38565	4.08618		10.5275	14.1279	10.0613
IL-10
	Control				R848
Vector	0.23861	2.05853	0.702861		1.90398	0.929792	0.79626
TLR7 OE	4.7006	12.644	8.76231		8.0032	18.1107	15.2561
IL-12
	Control				R848
Vector	1.06381	0.936824	0.999368		2.21266	1.38273	1.93078
TLR7 OE	4.73284	5.78152	2.65586		14.9048	18.1746	9.24825
CCL2
	Control				R848
Vector	1.07316	0.92676	1.00008		1.27742	0.611574	0.692612
TLR7 OE	3.88413	1.21074	1.90543		8.50249	12.7033	13.2702
CCL7
	Control				R848
Vector	0.548207	1.53495	0.916848		1.19918	0.191747	0.427725
TLR7 OE	1.33423	4.53515	1.96531		25.9624	19.0711	26.2593
CCL20
	Control				R848
Vector	0.899008	1.10555	0.995445	2.34333	1.95972	2.30284
TLR7 OE	1.57888	3.7913	3.16765	19.666	31.9886	22.0608
CXCL1
	Control				R848
Vector	1.41997	0.632307	0.947721	0.831476	1.09691	0.684221
TLR7 OE	1.26007	0.336032	0.470587	3.14329	6.7018	3.27736
CXCL2
	Control				R848
Vector	0.276772	1.98061	0.742621	7.57807	7.55321	5.17191
TLR7 OE	2.86323	0.679649	1.48524	69.9425	71.7625	79.3797
CXCL10
	Control				R848
Vector	1.01203	0.989424	0.998544	6.0174	1.58309	2.63517
TLR7 OE	0.711329	4.3862	1.8124	29.7858	26.2092	25.2445
Figure 4B
Ccl3
	Scr siRNA							siRNA#1							siRNA#2
Control	1.33509	1.33963	0.711658	0.613622	1.3	0.7		1.46137	2.11462	1.06292	1.06513	1.8	1		0.510236	0.465238	1	2	6	4
LL37	37.4016	41.1827	18.4623	16.874	22.1339	25.6813		4.82712	5.84291	5.64306	6.63288	7.83394	8.98818		8.41857	8.19303	5.9237	6.41571	4.89363	2.84794
Ccl5
	Scr siRNA							siRNA#1							siRNA#2
Control	1.16561	0.870934	1.08809	0.875367	1	1		0.739234	0.974319	0.399031	0.330885	0.9	0.4		0.634101	0.697941	1.09899	1.01039	0.7	1
LL37	4.77082	4.21901	2.6891	2.2893	4.31007	5.91378		3	2.1	2.25554	3.24855	2.17193	1.9406		1.65955	2.03025	1.55907	1.70923	1.23211	1.14042
Ccl7
	Scr siRNA							siRNA#1							siRNA#2
Control	1.07152	1.06052	1.05646	0.811495	1.1	0.9		1.90797	3.6768	0.402478	0.402105	2.8	0.4		0.689665	0.589365	0.568631	0.416242	0.6	0.5
LL37	25.2088	25.8044	27.9362	29.762	34.8779	36.6364		20.8318	20.2779	29.9978	25.4913	9.92116	8.0732		19.1227	18.406	13.5248	14.1984	15.8491	15.0482
Cxcl1
	Scr siRNA							siRNA#1							siRNA#2
Control	1.27912	1.50135	0.638843	0.580691	1.4	0.6		0.684098	0.742488	0.447725	0.29418	0.7	0.4		0.676923	0.635238	0.437866	0.532049	0.6	0.5
LL37	19.8034	17.1403	24.5041	17.8915	8.40317	12.4869		6.72624	5.73161	5.48394	4.69467	2.99854	2.04182		6.71031	6.58875	1.54214	4.49881	6.46743	7.21268
Cxcl2
	Scr siRNA							siRNA#1							siRNA#2
Control	1.25204	1.17912	0.814445	0.754398	1.2	0.8		4.22641	6.47097	1.6906	1.15228	5.3	1.4		0.499578	0.326393	0.4	1	2.5	3.4
LL37	162.987	158.986	70.6711	52.9083	30.5013	48.9411		12.9856	9.6273	15.5174	17.2235	12.1376	8.30003		8.72515	9.62594	5.35946	11.9918	30.5492	27.1188
Cxcl10
	Scr siRNA							siRNA#1							siRNA#2
Control	1.44775	1.5693	0.503966	0.478983	1.5	0.5		1.89864	2.18032	1.88861	1.23426	2	1.6		1.48903	0.986469	0.843913	0.876322	1.2	0.9
LL37	21.421	18.601	13.0824	14	10.8377	16.3537		3.43552	2.58402	3	4	4.67088	3.13701		2.61479	3.82304	0.40312	1.0399	3.09881	2.85744
Cxcl11
	Scr siRNA							siRNA#1							siRNA#2
Control	1.10473	1.46531	0.733177	0.696777	1.3	0.7		2.28028	3.80157	1.80538	1.23292	3	1.5		1.82971	1.1184	0.774341	1.075	1.5	0.9
LL37	15.0023	13.0936	14	10	8.39217	11.2999		3.17425	2.18296	6.69618	6.73147	8.25011	4.5934		1.34771	1.38841	0.173652	0.876651	1.37266	1.31696
Figure 4C
IL-1β
	DMSO				QNZ
Control	1.14712	0.905632	0.947252		1.04456	0.92102	1.01755
R848	2.75391	2.47423	3.68563		1.13748	1.0395	1.28545
CCL7
	DMSO				QNZ
Control	1.02707	0.970549	1.00238		0.993304	0.781611	0.974969
R848	1.53276	1.95637	1.54053		1.24292	0.679291	0.713719
CCL20
	DMSO				QNZ
Control	1.04522	0.95113	1.00365		3.34998	4.10265	3.61816
R848	15.2653	17.2061	11.434		4.50912	6.58721	5.2973
CXCL10
	DMSO				QNZ
Control	0.904891	1.14861	0.946498		0.567984	0.456717	0.349642
R848	5.24279	5.96213	5.0657		2.70325	3.56708	3.25153
Figure 5F
IL-1β
	DMSO				RAPA
Control	1.09986	0.899207	1.00093		0.725701	0.628916	0.518115
R848	2.33186	2.71109	2.7728		1.45169	1.35715	1.02196
CCL2
	DMSO				RAPA
Control	1.04875	0.954976	0.996275		0.610217	0.631925	0.484516
R848	3.28139	3.50999	3.54213		2.49651	2.88578	1.78338
CCL20
	DMSO				RAPA
Control	1.06979	0.928851	1.00136		0.8434	0.638134	0.409507
R848	33.8415	41.0068	35.065		22.1512	20.1332	25.8476
CXCL1
	DMSO				RAPA
Control	1.06895	0.932929	0.998124		1.93276	2.10746	1.38251
R848	2.43341	2.79815	2.82312		2.19462	1.9696	1.76209
